# Supplementary material for: Reshaping the tumor microenvironment for increasing the distribution of glucose oxidase in tumor and inhibiting metastasis
Source: Royal Society of Chemistry journal article supplement (doi:10.1039/d0tb02468f), 2020-12-29
Supplement: d0tb02468f1.pdf [file d0tb02468f1.pdf]

## Reshape the tumor microenvironment for increasing the distribution of glucose oxidase in tumor and inhibiting metastasis

Shizhen Geng,<sup>a</sup> Rui Lou,<sup>a</sup> Qianwen Yin,<sup>a</sup> Shengnan Li,<sup>a</sup> Ruhe Yang,<sup>a</sup> Jie Zhou,<sup>a,\*</sup>

<sup>a</sup>School of Pharmaceutical Sciences, Zhengzhou University, Zhengzhou 450001,  
China

\*Corresponding Author. Tel: 86-371-67781908, Fax: 86-371-67781907.

*E-mail address:* jie\_0822@163.com (J. Zhou).

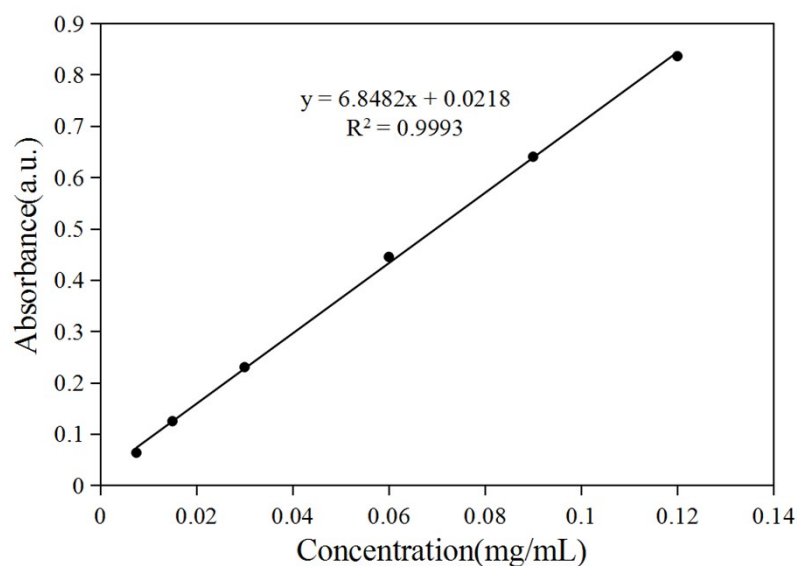

Fig. S1. Linear relationships between the UV-vis absorbance intensity at 240 nm and the concentration of Dex.

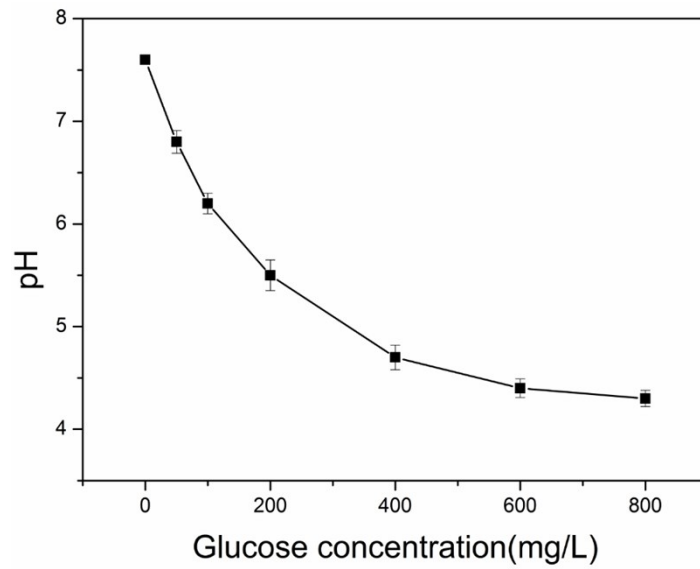

Fig. S2. pH detection in the samples treated with GOx@ZIF at different concentrations of glucose.

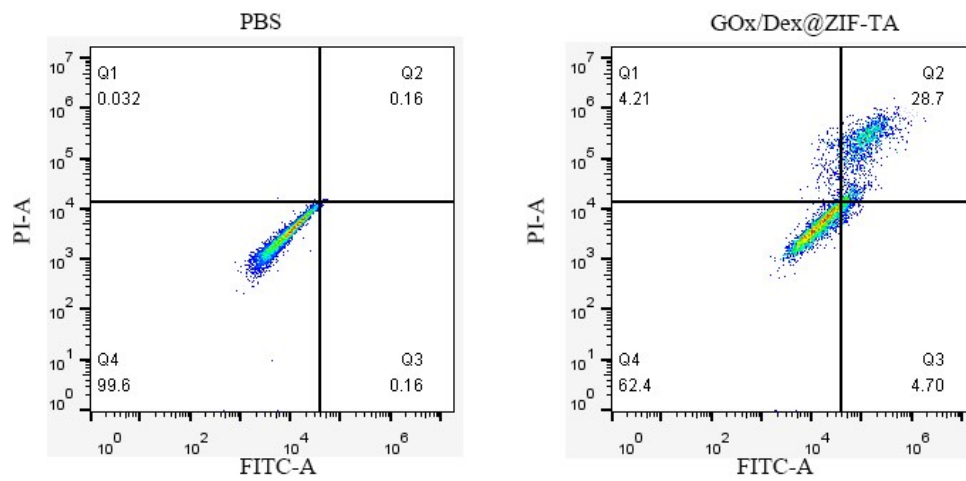

Fig. S3. Flow cytogram representing apoptosis assay of 4T1 cells after treatment with GOx/Dex@ZIF-TA for 24 h.

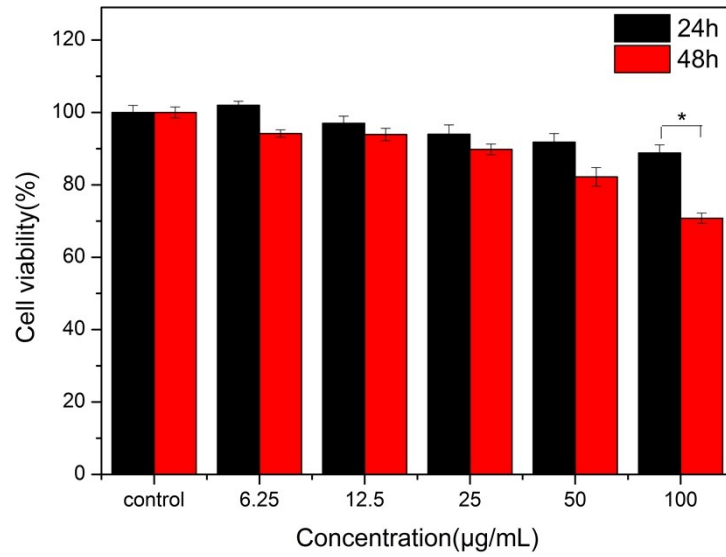

Fig. S4. Cytotoxicity test. Cell viabilities of HUVEC cells incubated with GOx/Dex@ZIF-TA at different concentrations for 24 and 48 h (n=6). (\* $P < 0.05$ )

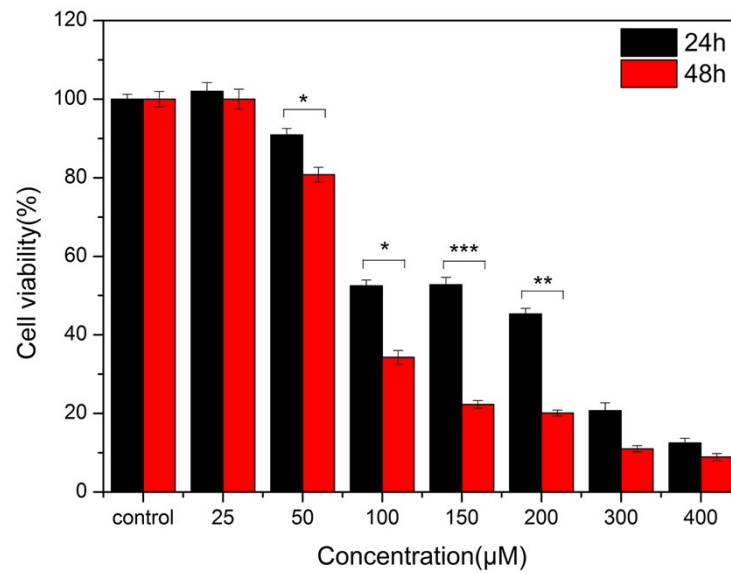

Fig. S5. Cytotoxicity test. Cell viabilities of 4T1 cells incubated with H<sub>2</sub>O<sub>2</sub> at different concentrations for 24 and 48 h (n=6). (\*\* $P < 0.01$ , \*\*\* $P < 0.001$ , \* $P < 0.05$ )

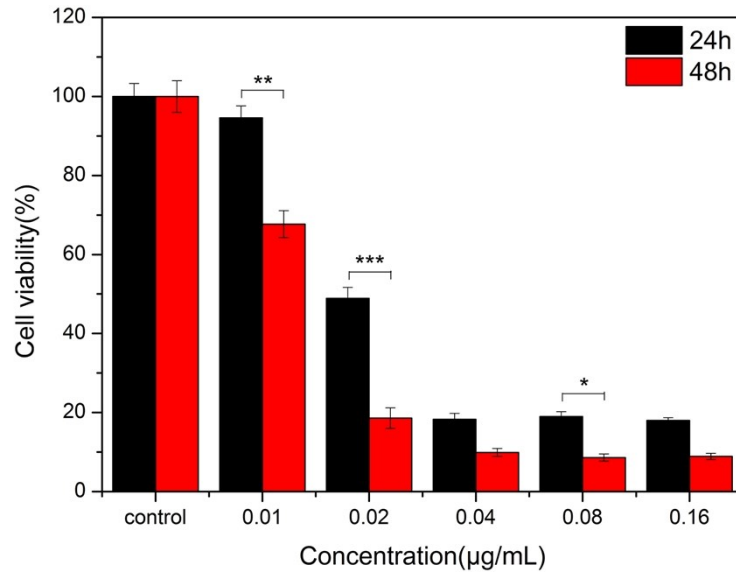

Fig. S6. Cytotoxicity test. Cell viabilities of 4T1 cells incubated with GOx at different concentrations for 24 and 48 h (n=6). (\*\* $P < 0.01$ , \*\*\* $P < 0.001$ , \* $P < 0.05$ )

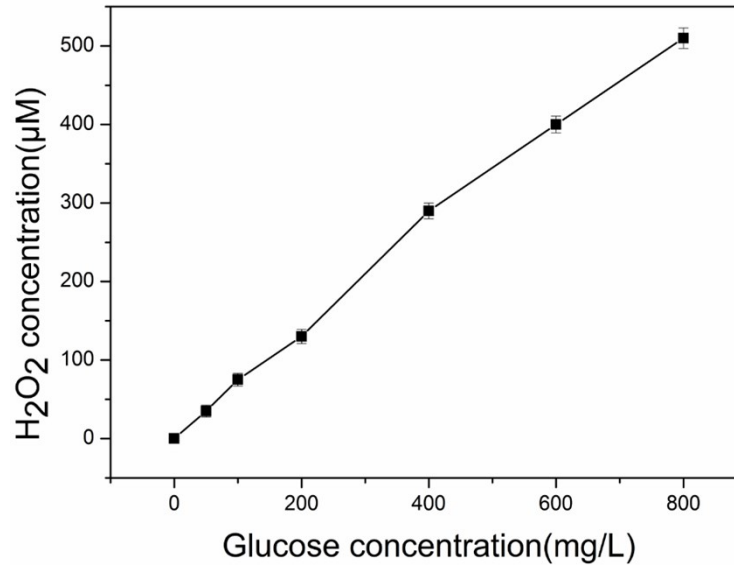

Fig. S7. H<sub>2</sub>O<sub>2</sub> generation of GOx@ZIF at different concentrations of glucose.

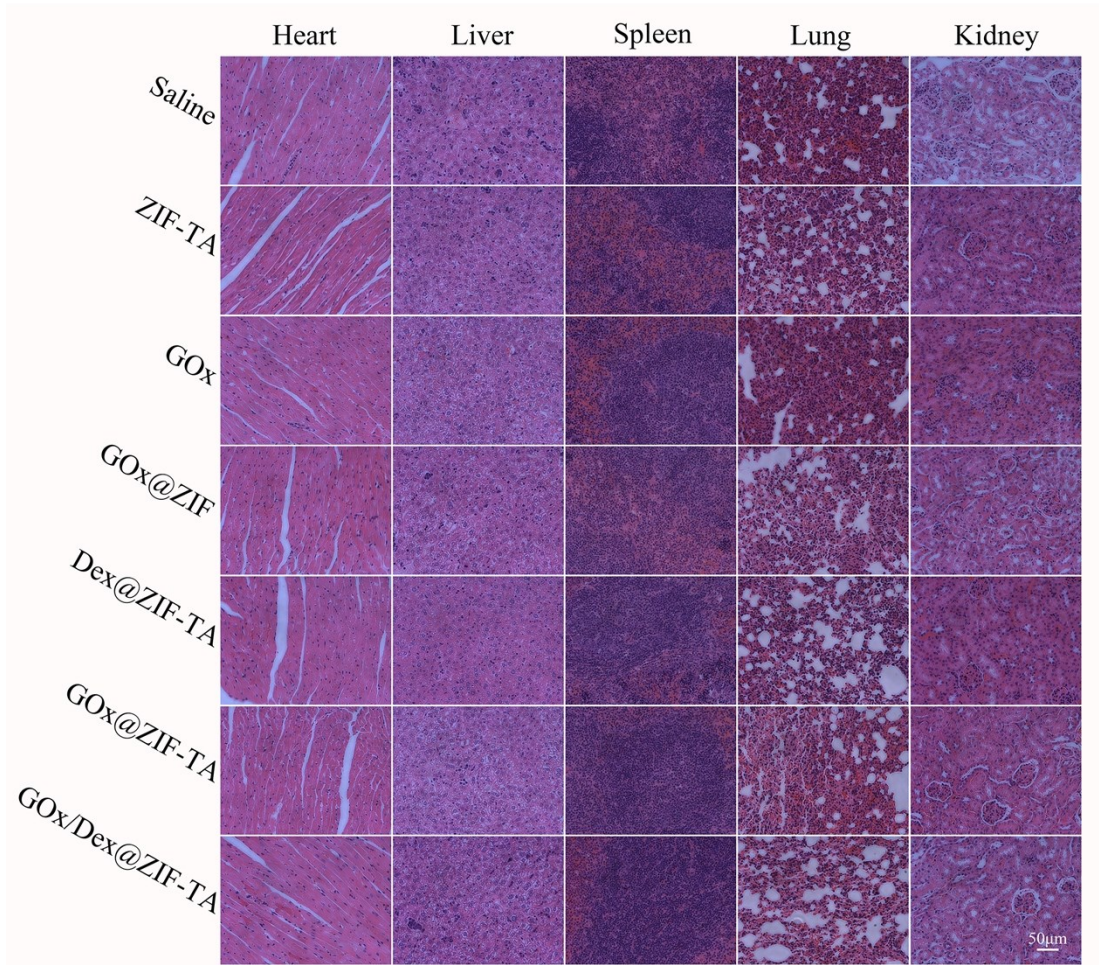

Fig. S8. H&E staining of major organs in different groups. The scale bar of insert images was 50  $\mu\text{m}$ .

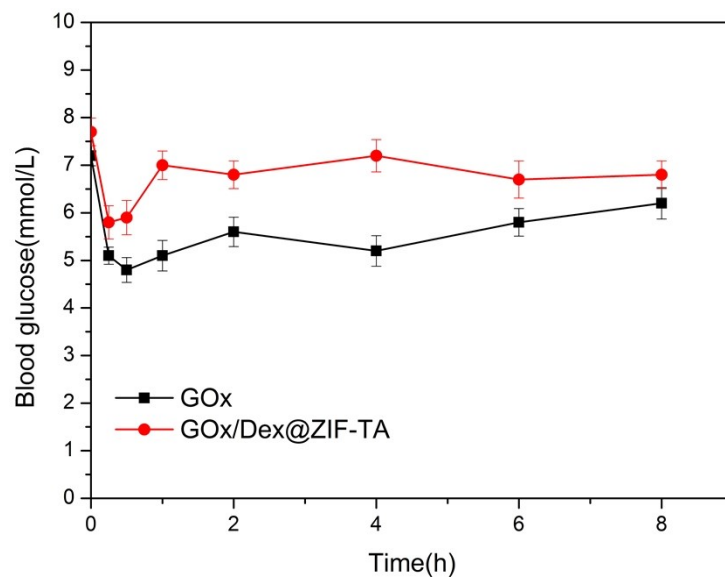

Fig. S9. Changes in blood glucose of different preparations in tumor-bearing mice (n=3).
